# Supplementary material for: Feasibility of continuous monitoring of vital signs in surgical patients on a general ward: an observational cohort study
Source: HighWire-hosted journal article supplement (doi:10.1136/bmjopen-2020-042735), 2021-02-01
Supplement: bmjopen-2020-042735supp001_data_supplement.pdf [file bmjopen-2020-042735supp001_data_supplement.pdf]

APPENDIX A: QUESTIONNAIRE FOR PATIENTS

I found the patch comfortable

1

2

3

4

5

Strongly disagree

Strongly agree

The patch made me feel safer

1

2

3

4

5

Strongly disagree

Strongly agree

I would like to wear the patch in the hospital next time again.

1

2

3

4

5

Strongly disagree

Strongly agree

I would like to wear the patch at home after surgery.

1

2

3

4

5

Strongly disagree

Strongly agree
