# Supplementary material for: Feasibility of continuous monitoring of vital signs in surgical patients on a general ward: an observational cohort study
Source: HighWire-hosted journal article supplement (doi:10.1136/bmjopen-2020-042735), 2021-02-01
Supplement: bmjopen-2020-042735supp002_data_supplement.pdf [file bmjopen-2020-042735supp002_data_supplement.pdf]

**APPENDIX B: USE QUESTIONNAIRE (translated from Dutch)****Usefulness**

1. It helps me be more effective.

|                   |   |   |   |   |   |                |
|-------------------|---|---|---|---|---|----------------|
| 1                 | 2 | 3 | 4 | 5 | 6 | 7              |
| Strongly disagree |   |   |   |   |   | Strongly agree |

2. It helps me be more productive.

|                   |   |   |   |   |   |                |
|-------------------|---|---|---|---|---|----------------|
| 1                 | 2 | 3 | 4 | 5 | 6 | 7              |
| Strongly disagree |   |   |   |   |   | Strongly agree |

3. It is useful.

|                   |   |   |   |   |   |                |
|-------------------|---|---|---|---|---|----------------|
| 1                 | 2 | 3 | 4 | 5 | 6 | 7              |
| Strongly disagree |   |   |   |   |   | Strongly agree |

4. It gives me more control over the activities in my life.

|                   |   |   |   |   |   |                |
|-------------------|---|---|---|---|---|----------------|
| 1                 | 2 | 3 | 4 | 5 | 6 | 7              |
| Strongly disagree |   |   |   |   |   | Strongly agree |

5. It makes the things I want to accomplish easier to get done.

|                   |   |   |   |   |   |                |
|-------------------|---|---|---|---|---|----------------|
| 1                 | 2 | 3 | 4 | 5 | 6 | 7              |
| Strongly disagree |   |   |   |   |   | Strongly agree |

6. It saves me time when I use it.

|                   |   |   |   |   |   |                |
|-------------------|---|---|---|---|---|----------------|
| 1                 | 2 | 3 | 4 | 5 | 6 | 7              |
| Strongly disagree |   |   |   |   |   | Strongly agree |

7. It meets my needs.

|                   |   |   |   |   |   |                |
|-------------------|---|---|---|---|---|----------------|
| 1                 | 2 | 3 | 4 | 5 | 6 | 7              |
| Strongly disagree |   |   |   |   |   | Strongly agree |

8. It does everything I would expect it to do.

|                   |   |   |   |   |   |                |
|-------------------|---|---|---|---|---|----------------|
| 1                 | 2 | 3 | 4 | 5 | 6 | 7              |
| Strongly disagree |   |   |   |   |   | Strongly agree |

**Ease of Use**

9. It is easy to use.

|                   |   |   |   |   |   |                |
|-------------------|---|---|---|---|---|----------------|
| 1                 | 2 | 3 | 4 | 5 | 6 | 7              |
| Strongly disagree |   |   |   |   |   | Strongly agree |

10. It is simple to use.

|                   |   |   |   |   |   |                |
|-------------------|---|---|---|---|---|----------------|
| 1                 | 2 | 3 | 4 | 5 | 6 | 7              |
| Strongly disagree |   |   |   |   |   | Strongly agree |

11. It is user friendly.

|                   |   |   |   |   |   |                |
|-------------------|---|---|---|---|---|----------------|
| 1                 | 2 | 3 | 4 | 5 | 6 | 7              |
| Strongly disagree |   |   |   |   |   | Strongly agree |

12. It requires the fewest steps possible to accomplish what I want to do with it.

|                   |   |   |   |   |   |                |
|-------------------|---|---|---|---|---|----------------|
| 1                 | 2 | 3 | 4 | 5 | 6 | 7              |
| Strongly disagree |   |   |   |   |   | Strongly agree |

13. It is flexible.

|                   |   |   |   |   |   |                |
|-------------------|---|---|---|---|---|----------------|
| 1                 | 2 | 3 | 4 | 5 | 6 | 7              |
| Strongly disagree |   |   |   |   |   | Strongly agree |

14. Using it is effortless.

|                   |   |   |   |   |   |                |
|-------------------|---|---|---|---|---|----------------|
| 1                 | 2 | 3 | 4 | 5 | 6 | 7              |
| Strongly disagree |   |   |   |   |   | Strongly agree |

15. I can use it without written instructions.

|                   |   |   |   |   |   |                |
|-------------------|---|---|---|---|---|----------------|
| 1                 | 2 | 3 | 4 | 5 | 6 | 7              |
| Strongly disagree |   |   |   |   |   | Strongly agree |

16. I don't notice any inconsistencies as I use it.

|                   |   |   |   |   |   |                |
|-------------------|---|---|---|---|---|----------------|
| 1                 | 2 | 3 | 4 | 5 | 6 | 7              |
| Strongly disagree |   |   |   |   |   | Strongly agree |

17. Both occasional and regular users would like it.

|                   |   |   |   |   |   |                |
|-------------------|---|---|---|---|---|----------------|
| 1                 | 2 | 3 | 4 | 5 | 6 | 7              |
| Strongly disagree |   |   |   |   |   | Strongly agree |

18. I can recover from mistakes quickly and easily.

|                   |   |   |   |   |   |                |
|-------------------|---|---|---|---|---|----------------|
| 1                 | 2 | 3 | 4 | 5 | 6 | 7              |
| Strongly disagree |   |   |   |   |   | Strongly agree |

19. I can use it successfully every time.

|                   |   |   |   |   |   |                |
|-------------------|---|---|---|---|---|----------------|
| 1                 | 2 | 3 | 4 | 5 | 6 | 7              |
| Strongly disagree |   |   |   |   |   | Strongly agree |

#### Ease of Learning

20. I learned to use it quickly.

|                   |   |   |   |   |   |                |
|-------------------|---|---|---|---|---|----------------|
| 1                 | 2 | 3 | 4 | 5 | 6 | 7              |
| Strongly disagree |   |   |   |   |   | Strongly agree |

21. I easily remember how to use it.

|                   |   |   |   |   |   |                |
|-------------------|---|---|---|---|---|----------------|
| 1                 | 2 | 3 | 4 | 5 | 6 | 7              |
| Strongly disagree |   |   |   |   |   | Strongly agree |

22. It is easy to learn to use it.

|                   |   |   |   |   |   |                |
|-------------------|---|---|---|---|---|----------------|
| 1                 | 2 | 3 | 4 | 5 | 6 | 7              |
| Strongly disagree |   |   |   |   |   | Strongly agree |

23. I quickly became skillful with it.

|                   |   |   |   |   |   |                |
|-------------------|---|---|---|---|---|----------------|
| 1                 | 2 | 3 | 4 | 5 | 6 | 7              |
| Strongly disagree |   |   |   |   |   | Strongly agree |

#### Satisfaction

|                                         |   |   |   |   |   |                |
|-----------------------------------------|---|---|---|---|---|----------------|
| 24. I am satisfied with it.             |   |   |   |   |   |                |
| 1                                       | 2 | 3 | 4 | 5 | 6 | 7              |
| Strongly disagree                       |   |   |   |   |   | Strongly agree |
| 25. I would recommend it to a friend.   |   |   |   |   |   |                |
| 1                                       | 2 | 3 | 4 | 5 | 6 | 7              |
| Strongly disagree                       |   |   |   |   |   | Strongly agree |
| 26. It is fun to use.                   |   |   |   |   |   |                |
| 1                                       | 2 | 3 | 4 | 5 | 6 | 7              |
| Strongly disagree                       |   |   |   |   |   | Strongly agree |
| 27. It works the way I want it to work. |   |   |   |   |   |                |
| 1                                       | 2 | 3 | 4 | 5 | 6 | 7              |
| Strongly disagree                       |   |   |   |   |   | Strongly agree |
| 28. It is wonderful.                    |   |   |   |   |   |                |
| 1                                       | 2 | 3 | 4 | 5 | 6 | 7              |
| Strongly disagree                       |   |   |   |   |   | Strongly agree |
| 29. I feel I need to have it.           |   |   |   |   |   |                |
| 1                                       | 2 | 3 | 4 | 5 | 6 | 7              |
| Strongly disagree                       |   |   |   |   |   | Strongly agree |
| 30. It is pleasant to use.              |   |   |   |   |   |                |
| 1                                       | 2 | 3 | 4 | 5 | 6 | 7              |
| Strongly disagree                       |   |   |   |   |   | Strongly agree |
